# Supplementary material
Source: PubMed Central journal article supplement (PMC2813691)
Supplement: NIHMS161185-supplement-supp1.pdf [file NIHMS161185-supplement-supp1.pdf]

## Supplement Material.

Supplemental Table I. Correlations of the cholesterol synthesis and absorption markers with Glucose and Insulin in NRL and FCH patients.

|             | NLR           |                | FCH           |                |
|-------------|---------------|----------------|---------------|----------------|
|             | Glucose       | Insulin        | Glucose       | Insulin        |
| Squalene    | 0.060         | -0.031         | -0.152        | -0.049         |
| Lathosterol | <b>0.261*</b> | <b>0.217†</b>  | <b>0.456*</b> | 0.112          |
| Desmosterol | <b>0.269*</b> | <b>0.239†</b>  | <b>0.382*</b> | 0.187          |
| Campesterol | -0.001        | <b>-0.150‡</b> | 0.087         | -0.145         |
| Sitosterol  | 0.026         | <b>-0.225†</b> | 0.008         | <b>-0.241‡</b> |
| Cholestanol | 0.010         | -0.132         | -0.067        | 0.070          |

Values represent Spearman Rank correlation coefficients. \*p<0.001, †p<0.01 and ‡p<0.05.

Supplemental Table II. Correlations of the cholesterol synthesis and absorption markers with apoB, triglycerides and LDL-C in all subjects (n=343) and by gender.

|                    | ApoB          | Triglycerides | LDL-C         |
|--------------------|---------------|---------------|---------------|
| <i>Squalene</i>    |               |               |               |
| Total              | 0.001         | -0.010        | 0.038         |
| Men                | -0.003        | -0.151        | 0.126         |
| Women              | -0.038        | 0.046         | -0.042        |
| <i>Lathosterol</i> |               |               |               |
| Total              | <b>0.577*</b> | <b>0.534*</b> | <b>0.385*</b> |
| Men                | <b>0.484*</b> | <b>0.514*</b> | <b>0.209‡</b> |
| Women              | <b>0.610*</b> | <b>0.498*</b> | <b>0.505*</b> |
| <i>Desmosterol</i> |               |               |               |
| Total              | <b>0.452*</b> | <b>0.383*</b> | <b>0.407*</b> |
| Men                | <b>0.236†</b> | <b>0.236†</b> | <b>0.231†</b> |
| Women              | <b>0.550*</b> | <b>0.430*</b> | <b>0.530*</b> |
| <i>Campesterol</i> |               |               |               |
| Total              | <b>0.270*</b> | 0.010         | <b>0.248*</b> |
| Men                | <b>0.326*</b> | -0.033        | <b>0.276*</b> |
| Women              | <b>0.201†</b> | -0.005        | <b>0.230†</b> |
| <i>Sitosterol</i>  |               |               |               |
| Total              | <b>0.275*</b> | -0.038        | <b>0.267*</b> |
| Men                | <b>0.393*</b> | 0.000         | <b>0.334*</b> |
| Women              | <b>0.172‡</b> | -0.098        | <b>0.212†</b> |
| <i>Cholestanol</i> |               |               |               |
| Total              | <b>0.153†</b> | -0.040        | <b>0.192*</b> |
| Men                | <b>0.212†</b> | -0.055        | <b>0.265†</b> |
| Women              | 0.066         | -0.086        | 0.127         |

Values represent Spearman Rank correlation coefficients. \*p<0.001, †p<0.01 and ‡p<0.05.

Supplemental Table III. Key enzymes in the cholesterol metabolism pathway of which the genes possess a USF1 binding site

| Gene   | Chromosome | Protein                                                      | Metabolic Function                                                                                           |
|--------|------------|--------------------------------------------------------------|--------------------------------------------------------------------------------------------------------------|
| MVK    | 12q24      | mevalonate kinase                                            | Converts Mevalonic acid into mevalonate 5-phosphate.                                                         |
| PMVK   | 1q22       | phosphomevalonate kinase                                     | Converts mevalonate 5-phosphate into mevalonate 5-diphosphate.                                               |
| SC5DL  | 11q23.3    | sterol-C5-desaturase-like                                    | Converts of lathosterol into 7-dehydrocholesterol.                                                           |
| DHCR24 | 1p33-p31.1 | 24-dehydrocholesterol reductase<br>(also known as Seladin-1) | Catalyzes the reduction of the delta-24 double bond of sterol intermediates during cholesterol biosynthesis. |
